# Supplementary material for: One-step synthesis of polypyrazoles and self-assembled polypyrazole–copper catalysts for click chemistry
Source: Royal Society of Chemistry journal article supplement (doi:10.1039/c3py01105d), 2013-09-03
Supplement: c3py01105d.pdf [file c3py01105d.pdf]

## Supporting Information for

### One-step synthesis of polypyrazole and self-assembled polypyrazole-copper catalyst for click chemistry

Longqiang Xiao,<sup>a</sup> Shaojun Cai,<sup>b</sup> Qingye Liu,<sup>a</sup> Liqiong Liao,<sup>a</sup> Xin Guo,<sup>a</sup> Yan Li,<sup>a</sup> Xiangxiang Jia,<sup>a</sup> Feifei Li,<sup>a</sup> Lijian Liu<sup>\*,a</sup>

<sup>a</sup>Department of Chemistry, Wuhan University, Wuhan, 430072, China

<sup>b</sup>Key Laboratory of Optoelectronic Chemical Materials and Devices of Ministry of Education, Jiangnan University, Wuhan, 430056, China

\*To whom correspondence should be addressed: liulj@whu.edu.cn

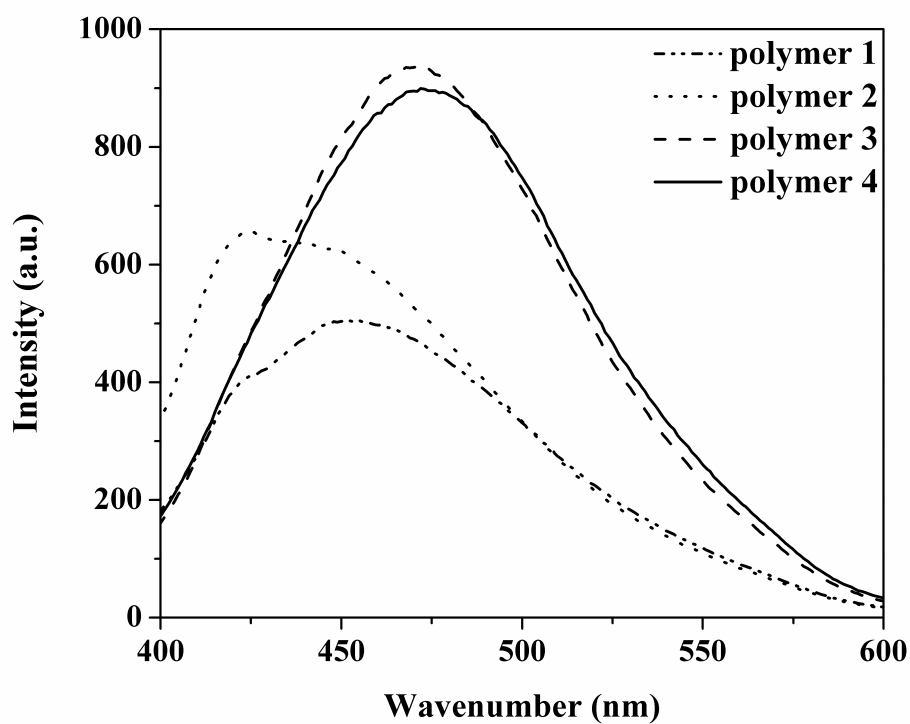

Figure S1. Fluorescence emission spectra of the obtained polymers in DMSO (0.4 mg/mL).

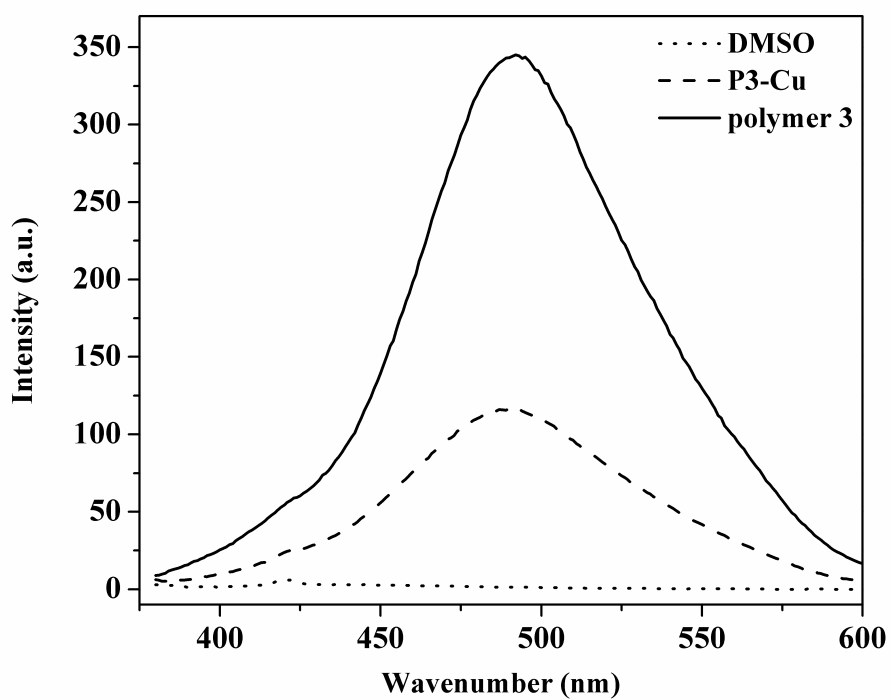

Figure S2. Fluorescence emission spectra of P3 and P3-Cu in DMSO (both 0.2 mg/mL).

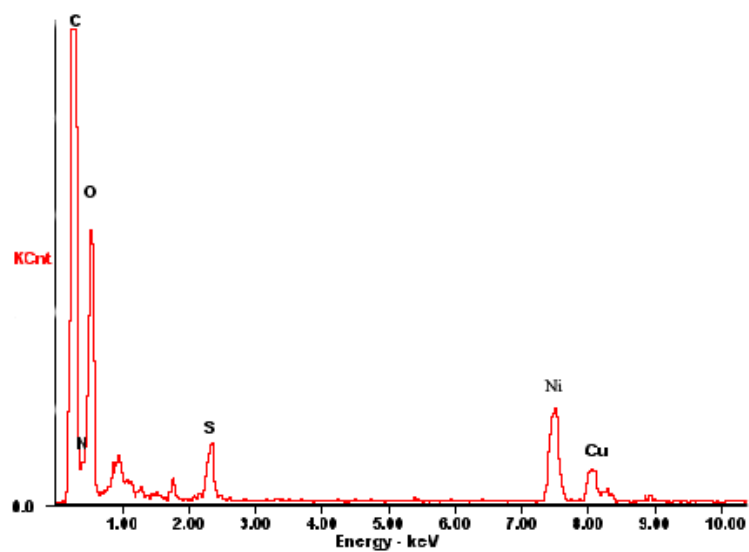

Figure S3. EDX analysis result of P3-Cu.

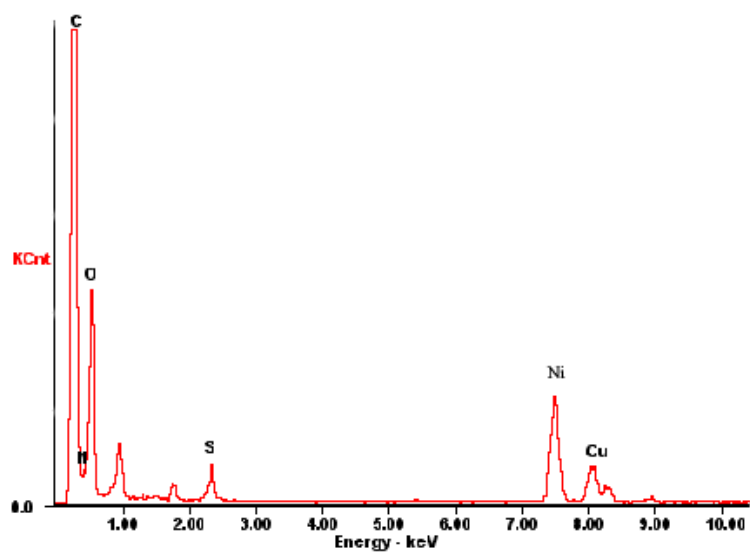

Figure S4. EDX analysis result of recovered P3-Cu.

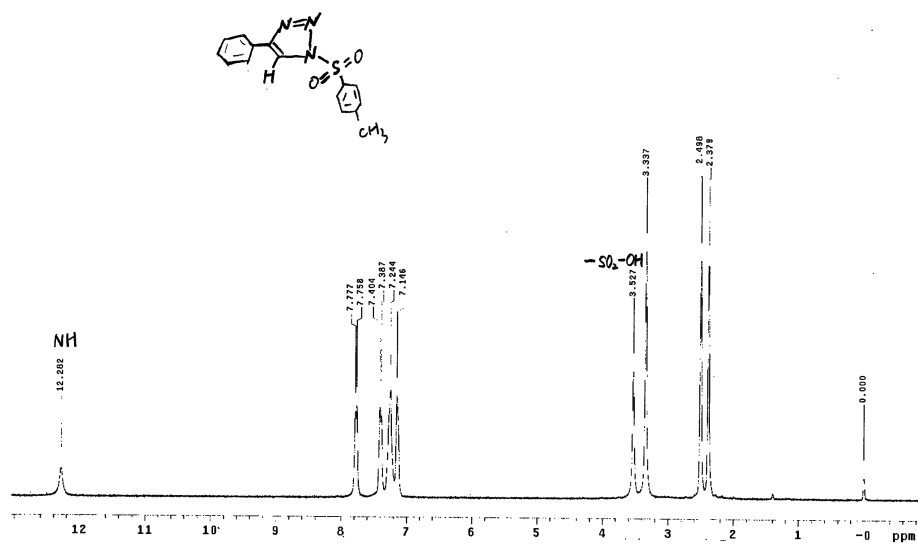

Figure S5.  $^1\text{H NMR}$  spectrum of 6a.

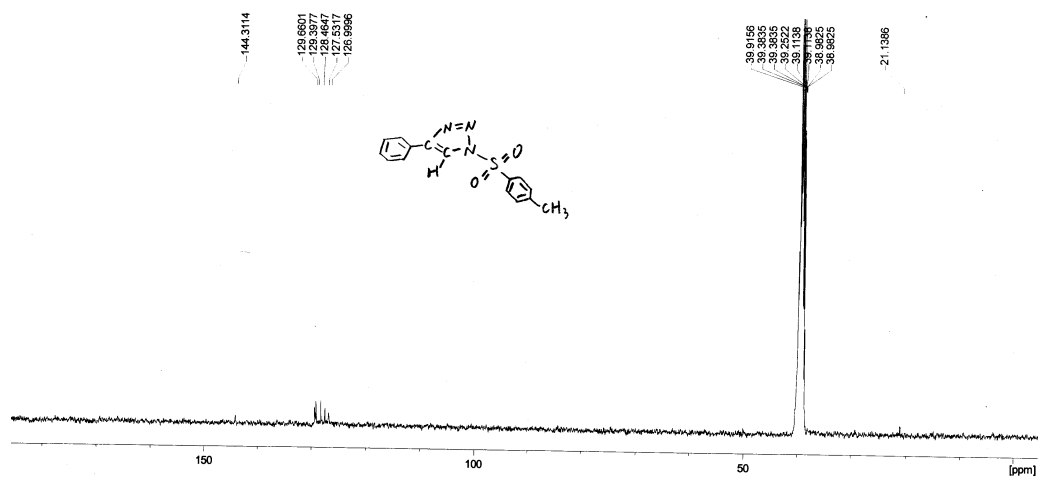

Figure S6.  $^{13}\text{C NMR}$  spectrum of 6a.

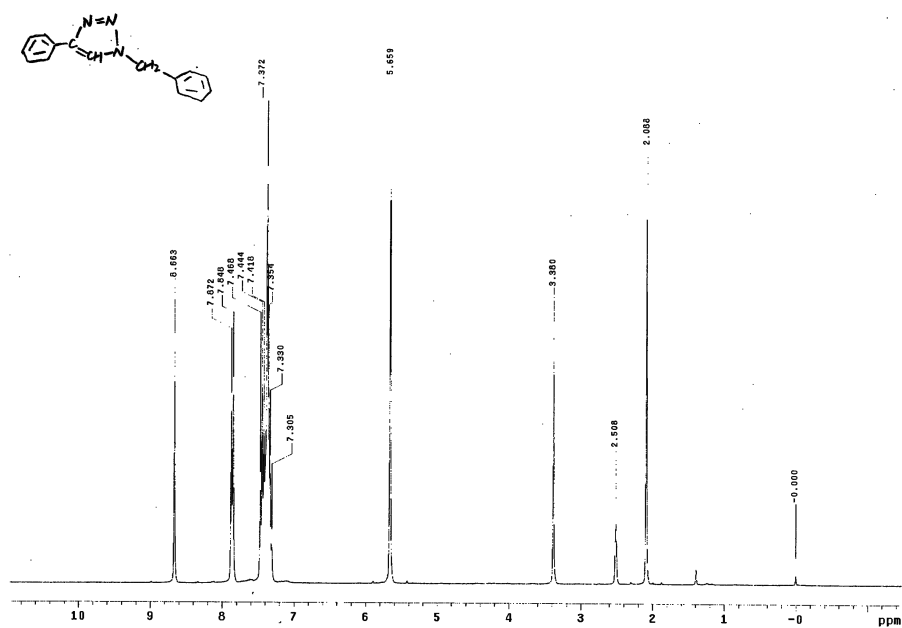

Figure S7. <sup>1</sup>H NMR spectrum of 6b.

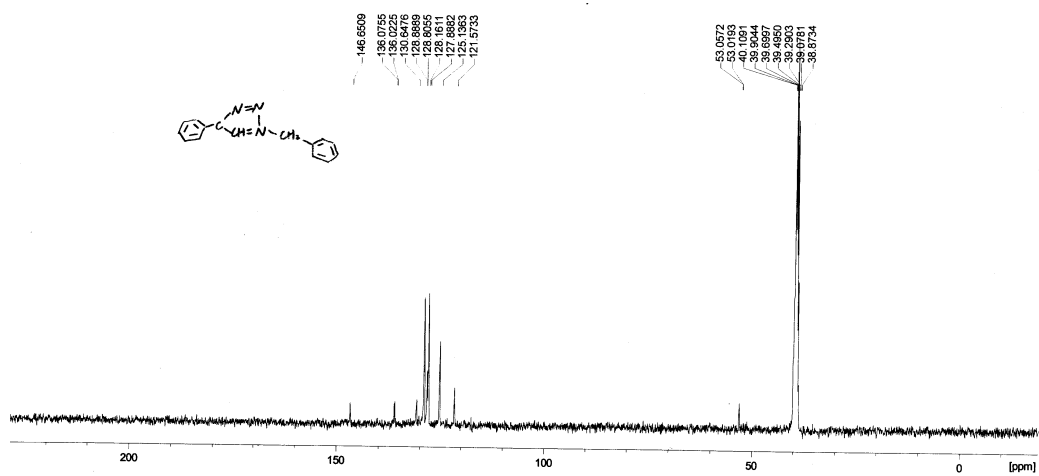

Figure S8. <sup>13</sup>C NMR spectrum of 6b.

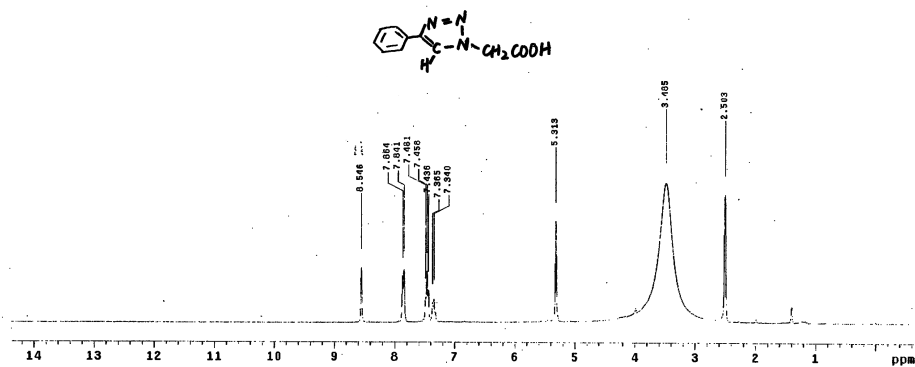

Figure S9. <sup>1</sup>H NMR spectrum of 6c.

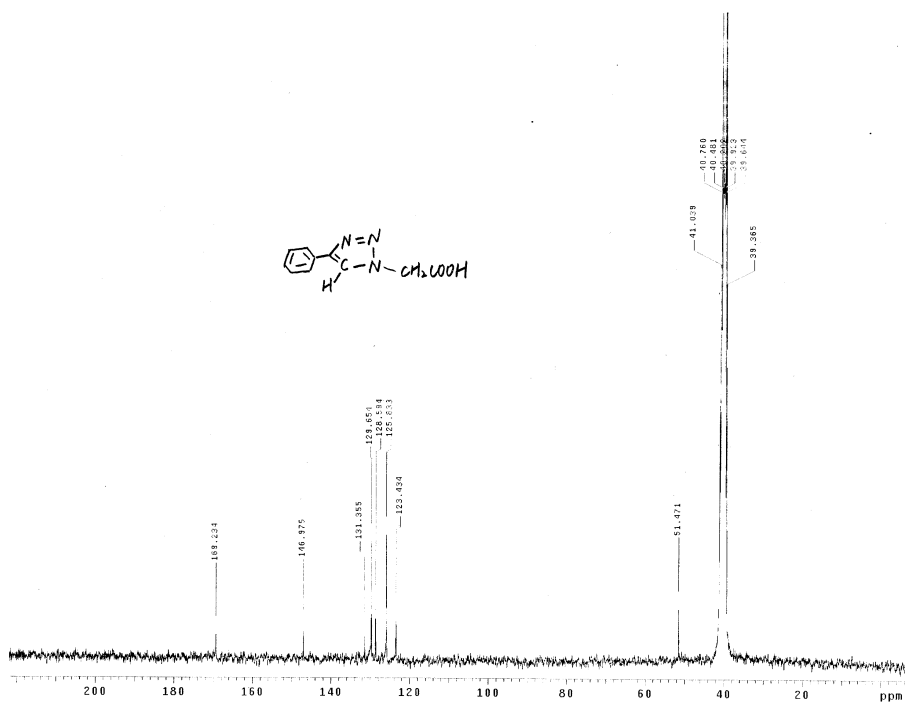

Figure S10. <sup>13</sup>C NMR spectrum of 6c.

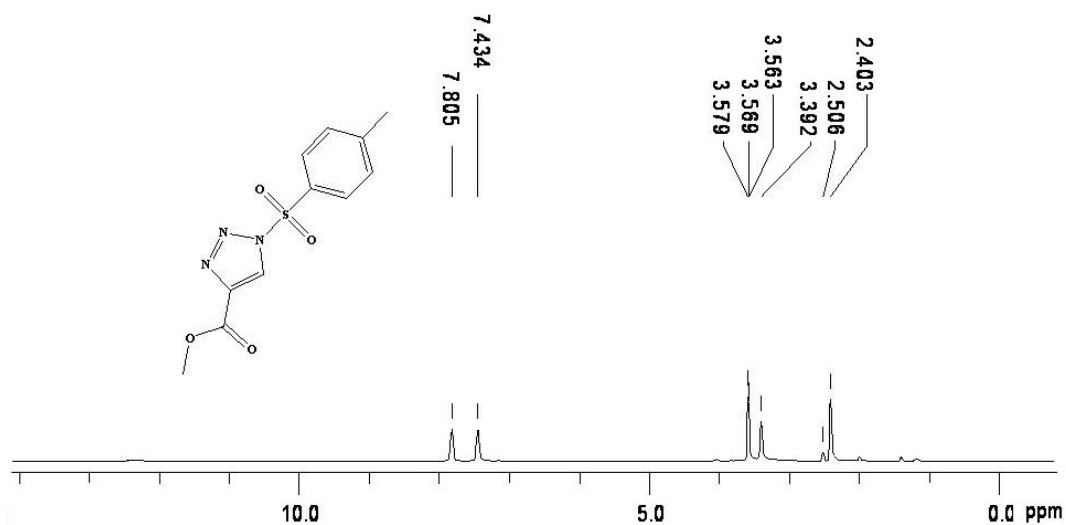

Figure S11. <sup>1</sup>H NMR spectrum of 6d.

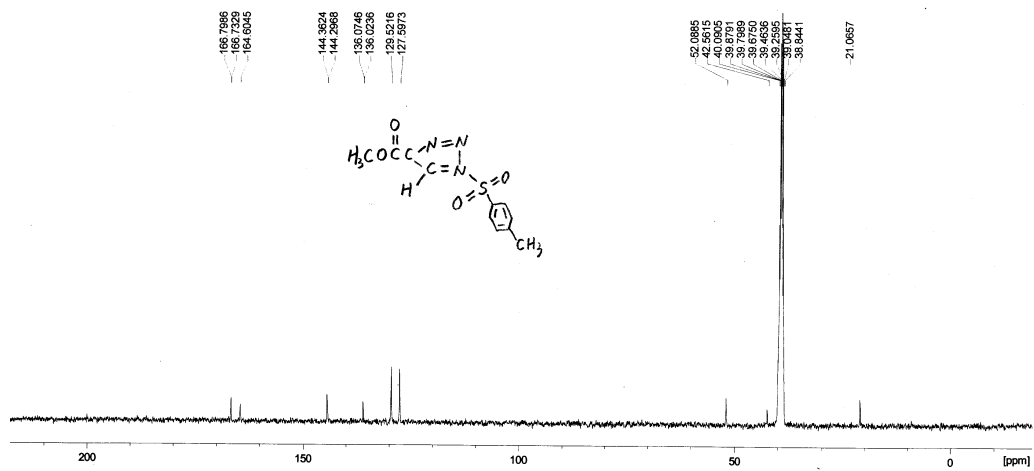

Figure S12. <sup>13</sup>C NMR spectrum of 6d.



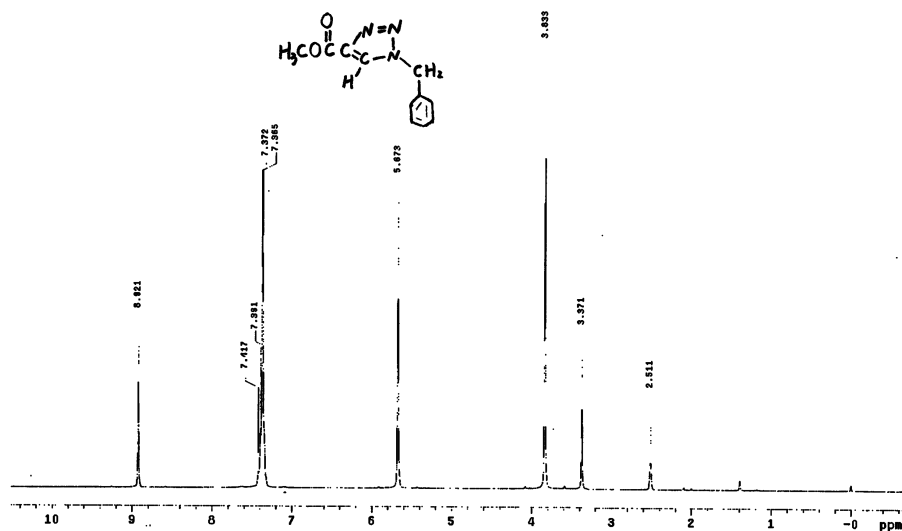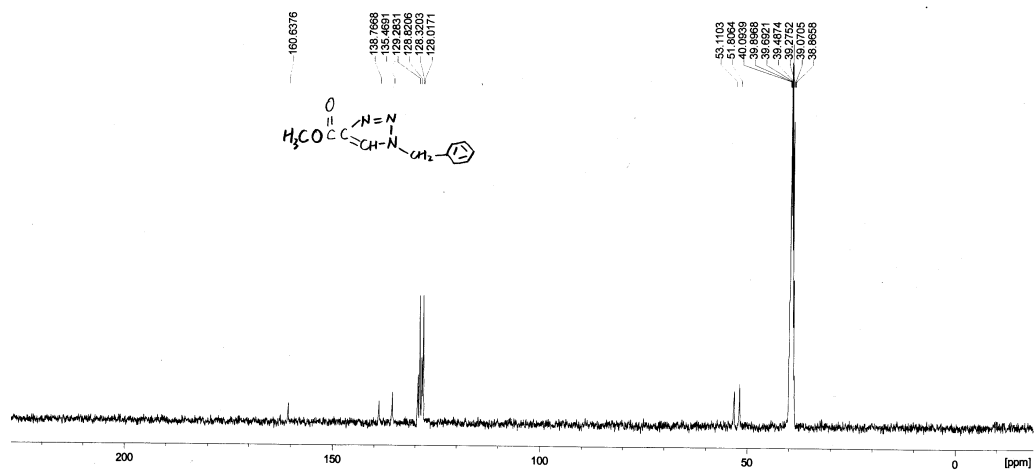

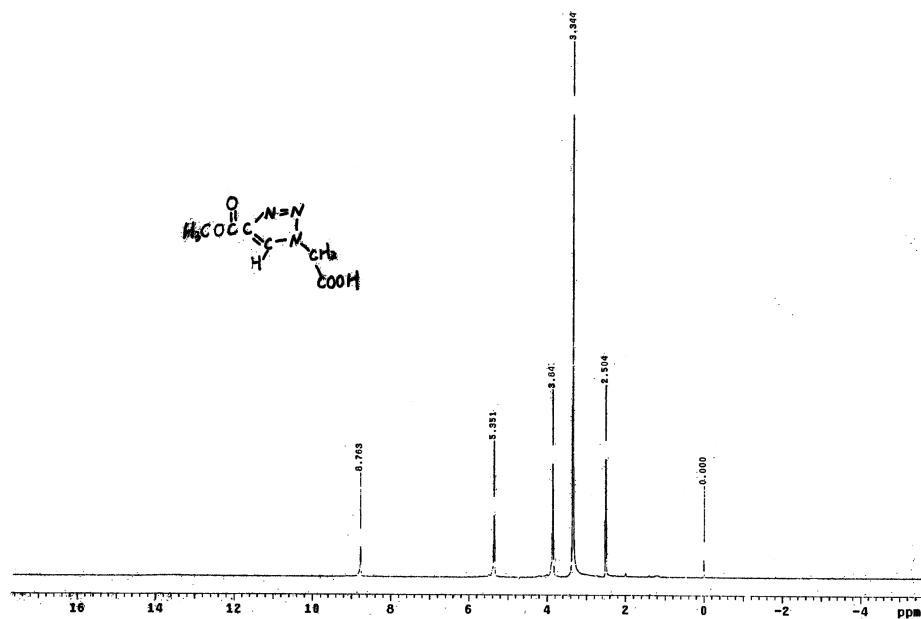

Figure S15.  $^1\text{H}$  NMR spectrum of 6f.

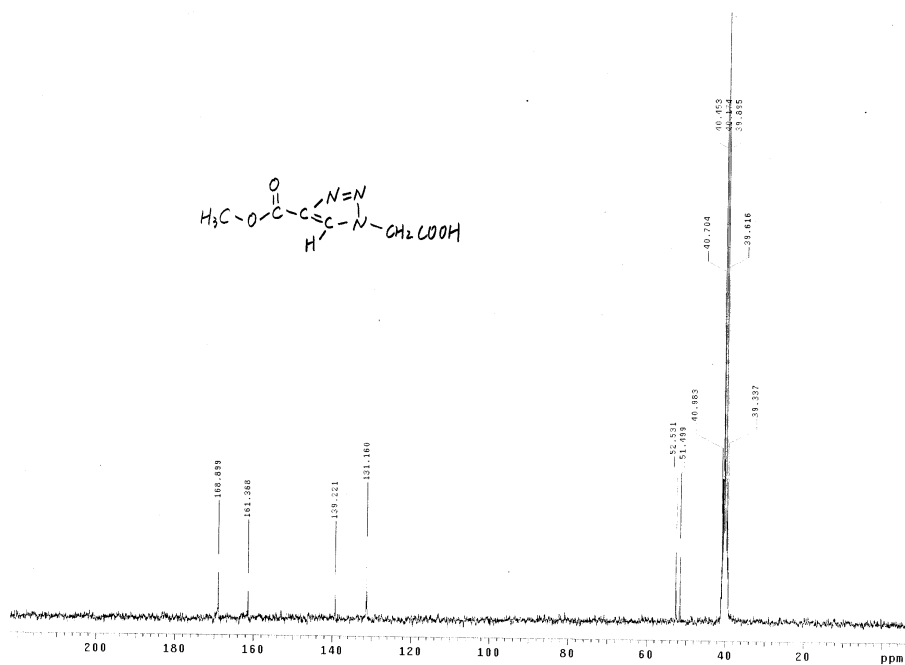

Figure S16.  $^{13}\text{C}$  NMR spectrum of 6f.

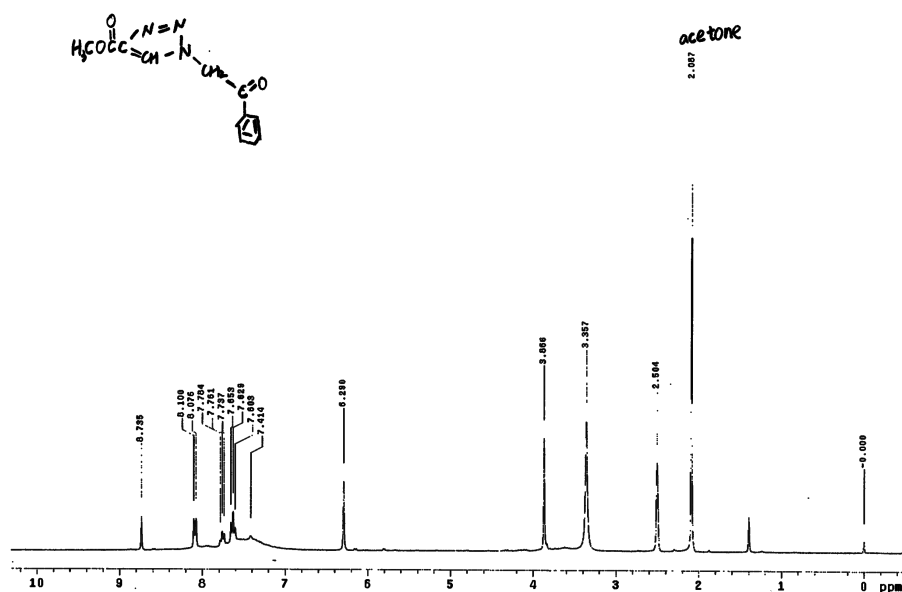

Figure S17. <sup>1</sup>H NMR spectrum of 6g.

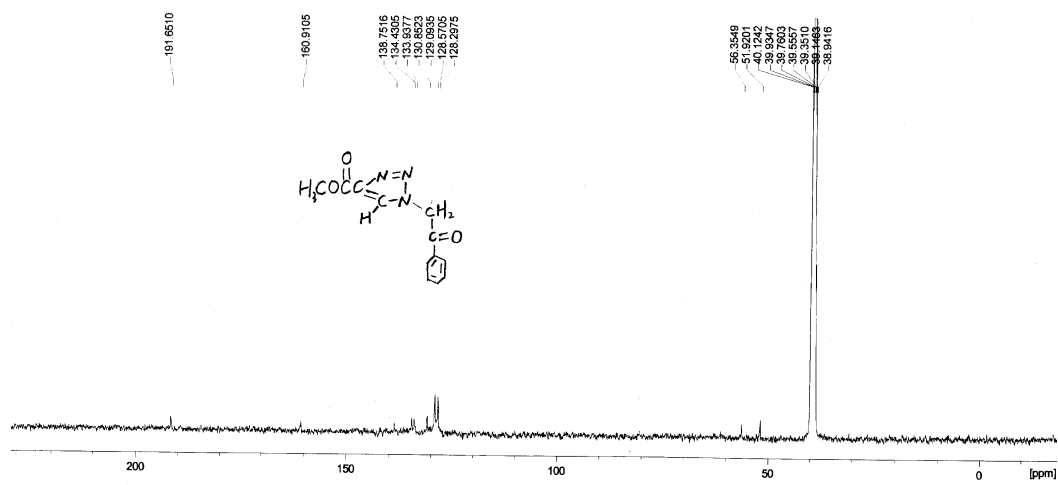

Figure S18. <sup>13</sup>C NMR spectrum of 6g.

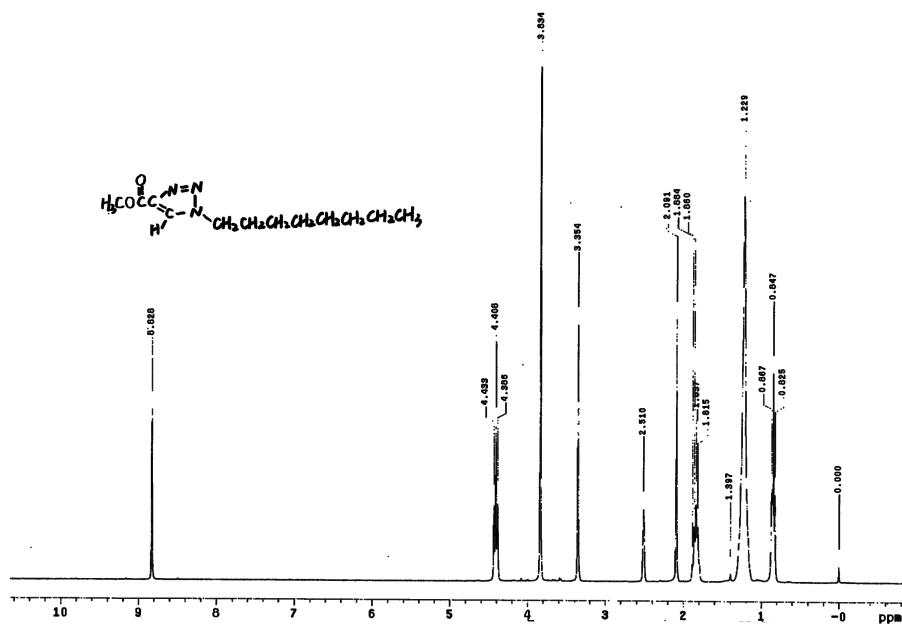

Figure S19.  $^1\text{H}$  NMR spectrum of 6h.

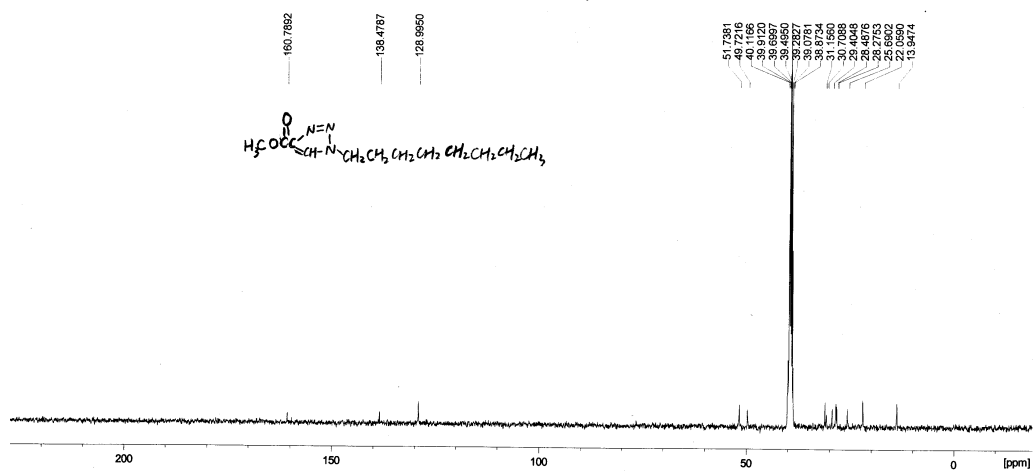

Figure S20.  $^{13}\text{C}$  NMR spectrum of 6h.

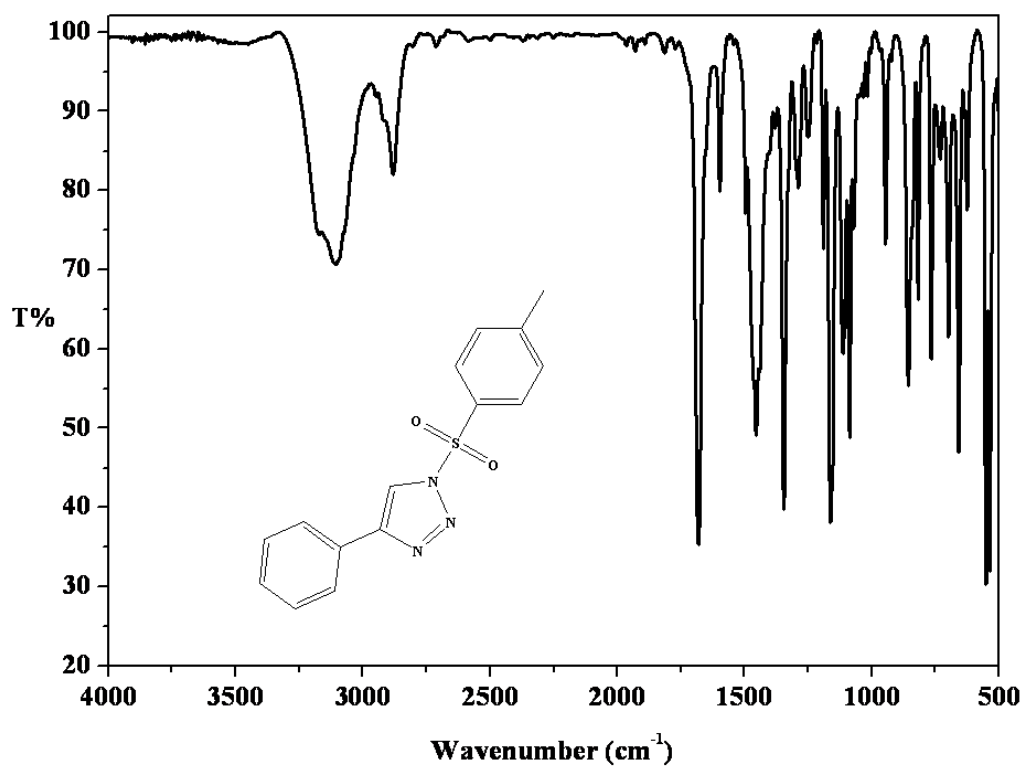

Figure S21. FTIR spectrum of 6a.

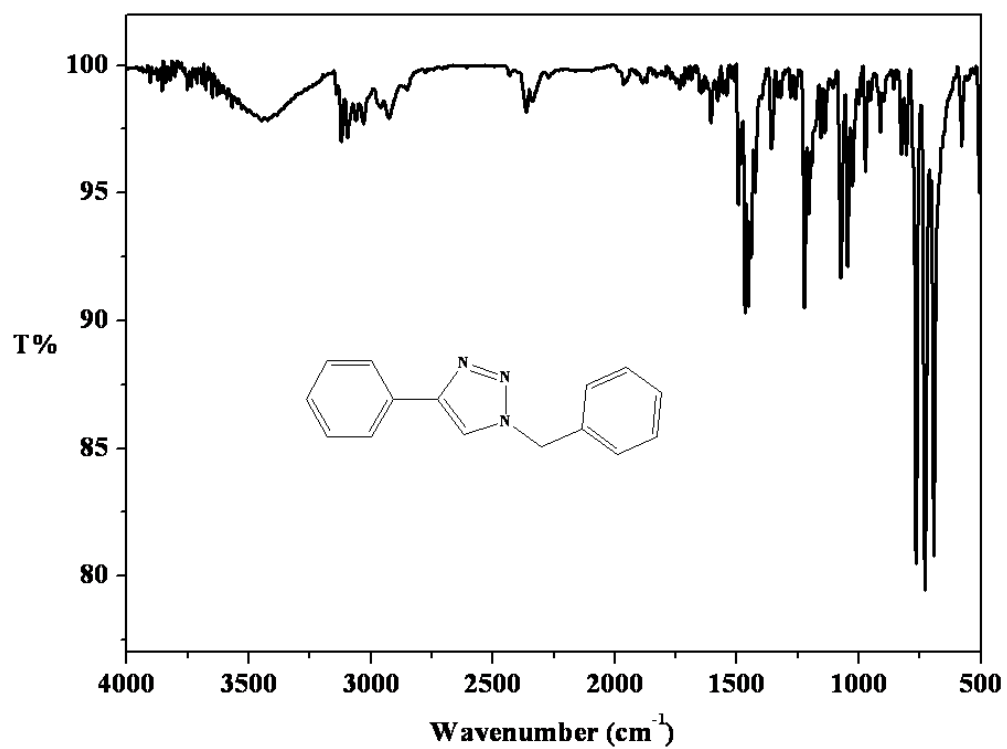

Figure S22. FTIR spectrum of 6b.

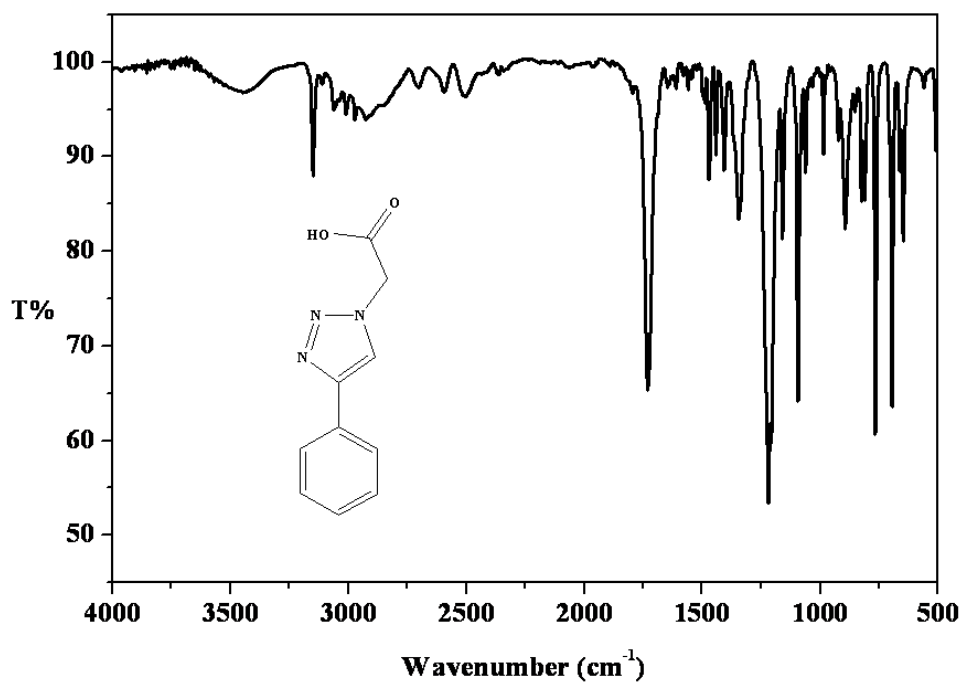

Figure S23. FTIR spectrum of 6c.

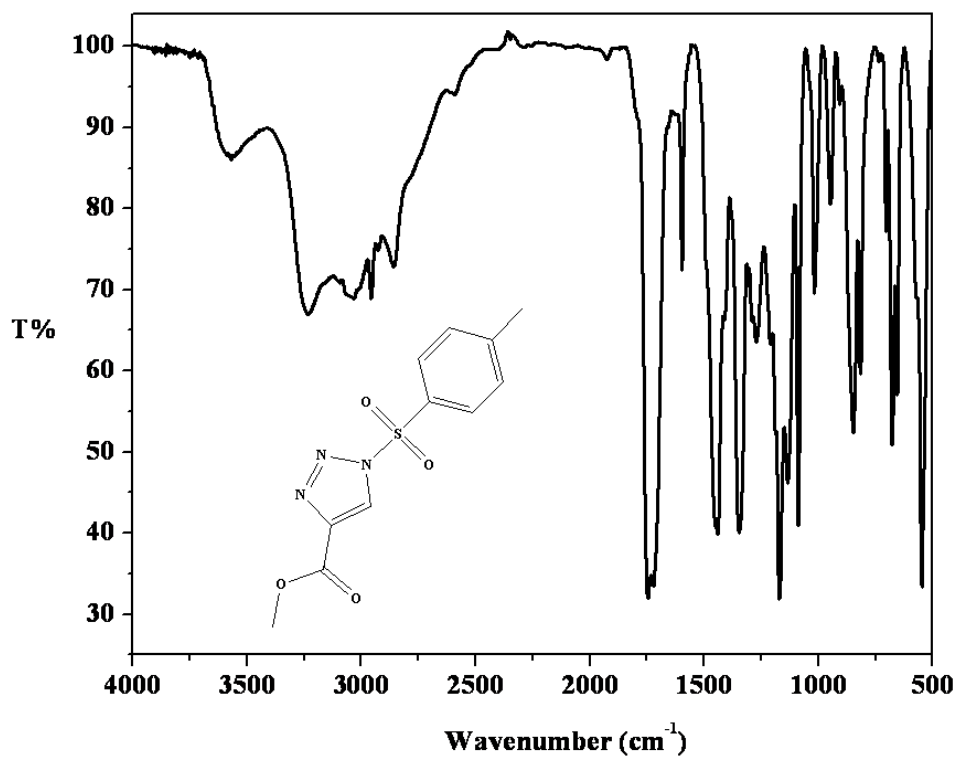

Figure S24. FTIR spectrum of 6d.



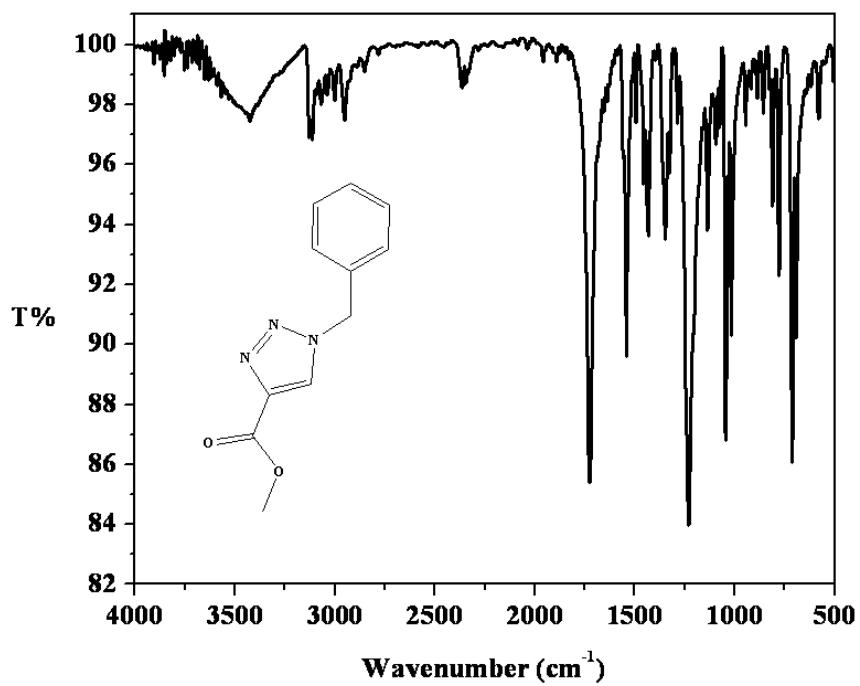

Figure S25. FTIR spectrum of 6e.

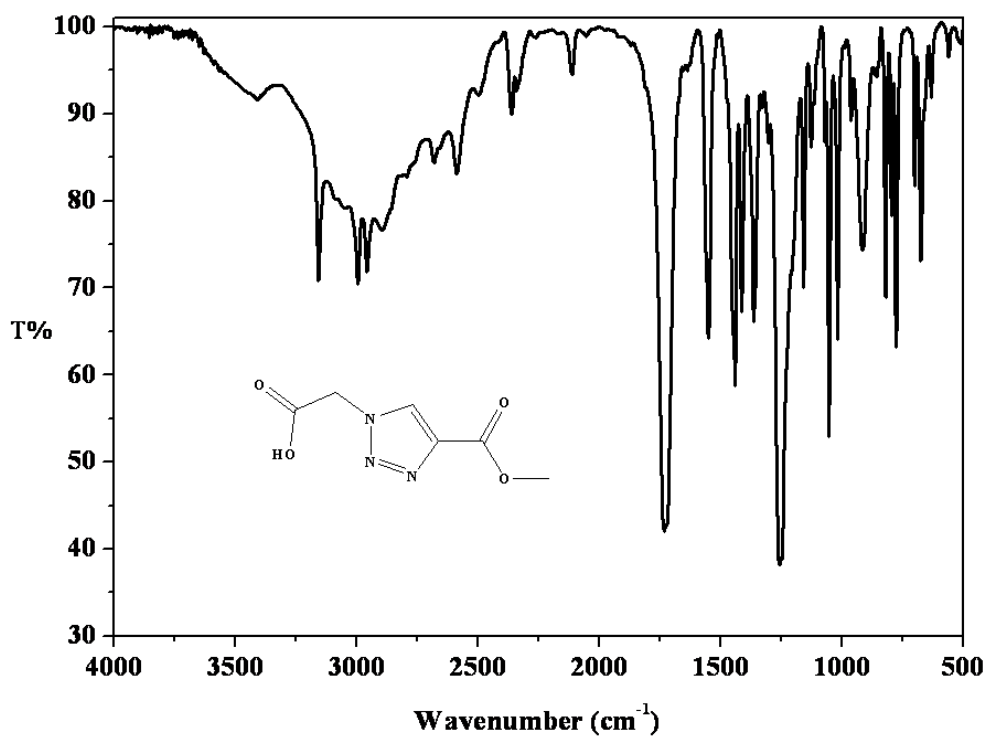

Figure S26. FTIR spectrum of 6f.

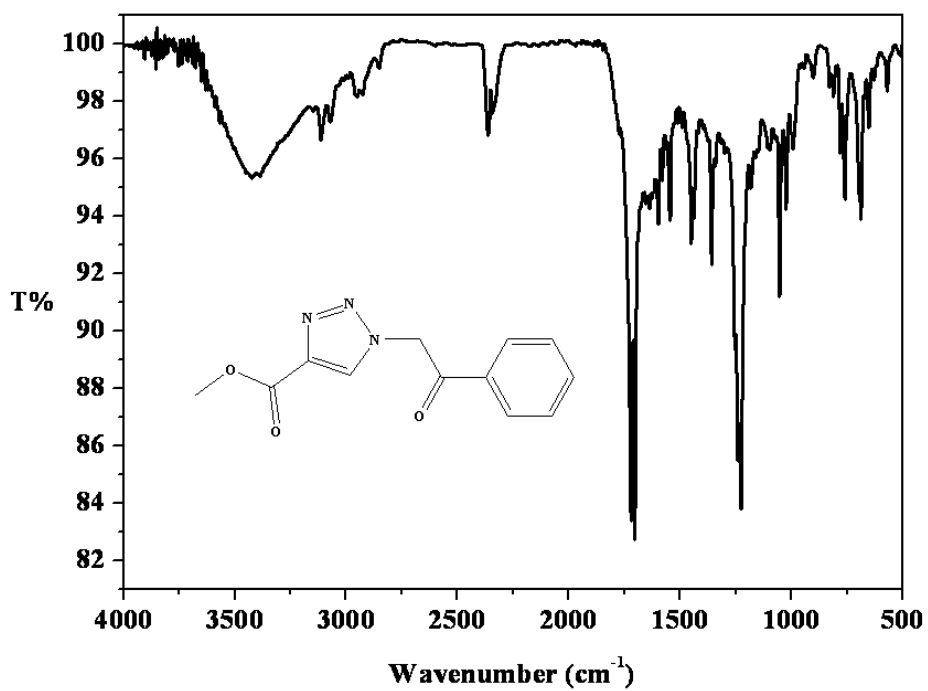

Figure S27. FTIR spectrum of 6g.

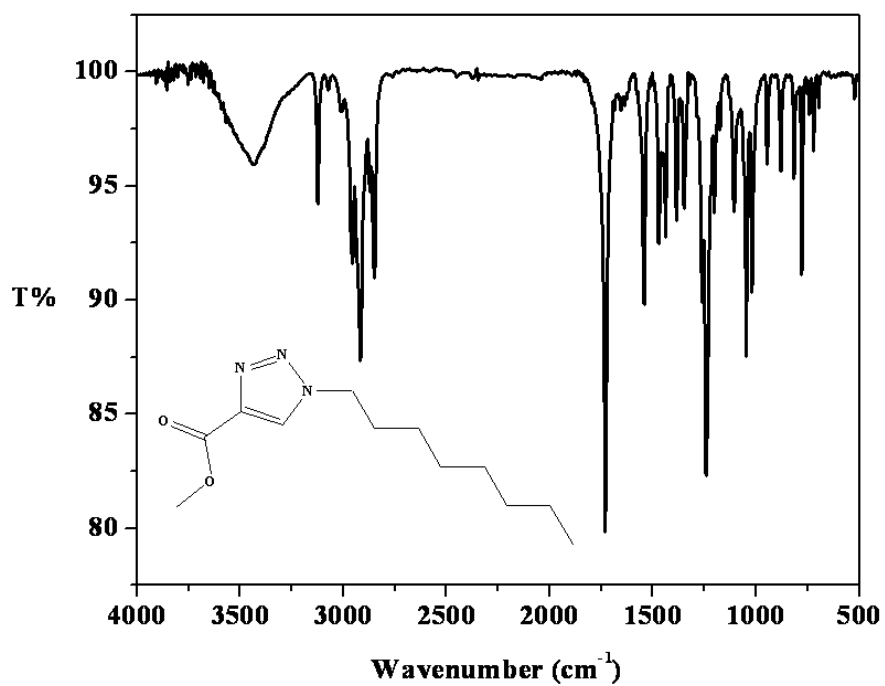

Figure S28. FTIR spectrum of 6h.
